# Supplementary material for: The Role of circRNA‐SETD2/miR‐519a/PTEN Axis in Fetal Birth Weight through Regulating Trophoblast Proliferation
Source: Hindawi journal article supplement (doi:10.1155/2020/9809632), 2020-01-01

| <b>Gene name</b>          | <b>Bi-directional primer sequence</b>                              |
|---------------------------|--------------------------------------------------------------------|
| <b>GAPDH</b>              | F:5'GGGAAACTGTGGCGTGAT3'<br>R:5'GAGTGGGTGTCGCTGTTGA3'              |
| <b>hsa_circRNA_102954</b> | F:5' GGGATTAAACTCTTTGTTTACTCC 3'<br>R:5' TATTTCCCCTGTCTCTGTGATG 3' |
| <b>hsa_circRNA_103811</b> | F:5' GAGCGAATAGAGAGAGAATCAGC 3'<br>R:5' CTGTCATTACTTCCCATTTC 3'    |
| <b>hsa_circRNA_001769</b> | F:5' GTTAATGGAAGTGAACCAAGCA 3'<br>R:5' CAGGGAAATTCTGTAGGGTAAAG 3'  |
| <b>hsa_circRNA_103345</b> | F:5' TGTTCCAATAGACGGTTTCAGAG 3'<br>R:5' GCACATTTTCAATCTTTGCCTC 3'  |
| <b>hsa_circRNA_101418</b> | F:5' AAAGCACATTTGGCATCACA 3'<br>R:5'CTTCTCAGTTTCAGTTTGTCTTAGC 3'   |
| <b>hsa_circRNA_101691</b> | F:5' GTGCTGGCTGAGACCCTAAC 3'<br>R:5' CAAGTCAAACAATGATCCAAAATC 3'   |
| <b>hsa_circRNA_102518</b> | F:5' TACATTGCATCGTTTGGGC 3'<br>R:5' AACTGTCTGTTGAGGTTGCTTAC 3'     |
| <b>hsa_circRNA_102944</b> | F:5' GAGGAGCATTGGAAGCGAA 3'<br>R:5' CTCAGAGTTCCCGCCTTGA 3'         |
| <b>hsa_circRNA_103052</b> | F:5' ATTCTGCCTGATCAATGC 3'<br>R:5' AAACCCTTCCTTCGTGAG 3'           |
| <b>hsa_circRNA_100904</b> | F:5' TTCCCGACTCTTTCCTTTC 3'<br>R:5' CGATGACAGACAGCACTT 3'          |
| <b>hsa_circRNA_102259</b> | F:5' GTCGGTAACAGATCCAAC 3'<br>R:5' ACAAGGCGTAAGCAACT 3'            |
| <b>hsa_circRNA_104566</b> | F:5' GCCACGGACTATGAGAAG 3'<br>R:5' ACTTCAGTTGCTCCTCCT 3'           |

|                           |                                                              |
|---------------------------|--------------------------------------------------------------|
| <b>hsa_circRNA_104591</b> | F:5' ATGACAACCAGACAGAGAC 3'<br>R:5' AGCAGGACCAATGTTACTAA 3'  |
| <b>hsa_circRNA_101379</b> | F:5' AGTCTTTCTTCCCTTTCCTT3'<br>R:5' CCGTGTAACATAAGTGGTG 3'   |
| <b>hsa_circRNA_103856</b> | F:5' AGGATTCAAGCATCGGATT 3'<br>R:5' CACACTGAGCAGAACACT3'     |
| <b>hsa_circRNA_104438</b> | F:5' TTCATTCACATCAGACACAG 3'<br>R:5' ATACCAGAGCCACATTGC 3'   |
| <b>hsa_circRNA_104298</b> | F:5' GAAGTAGCCTTGGAAGCA 3'<br>R:5' TCCTGACCTTGTATACTCTTC 3'  |
| <b>hsa_circRNA_103664</b> | F:5' TATGGCACAGATTAGTCACT 3'<br>R:5' CAGGCTTGATGGATTGATG 3'  |
| <b>hsa_circRNA_103569</b> | F:5' CGTTATATTCCAGAGGCAAT 3'<br>R:5' CAAATGTCTAAGGTGTCCAA 3' |
| <b>hsa_circRNA_102566</b> | F:5' GTGTGAGGAAGAAGGAGATT 3'<br>R:5' GTCGCAGAGCAAGTAGAG 3'   |

---

Supplementary Figure 2

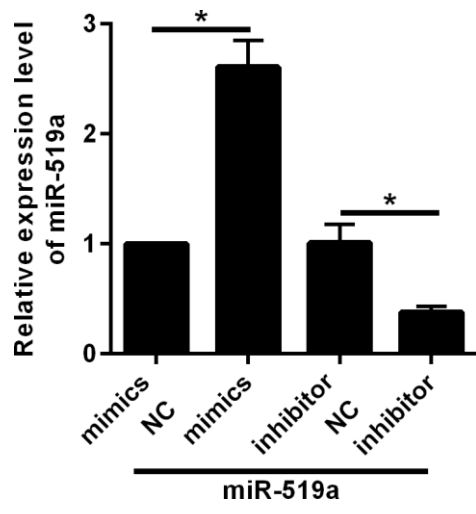

Supplement: f1 [file 9809632.f1.pdf]
